# Supplementary material
Source: PubMed Central journal article supplement (PMC10428174)

# Full unedited gel for Figure 1B

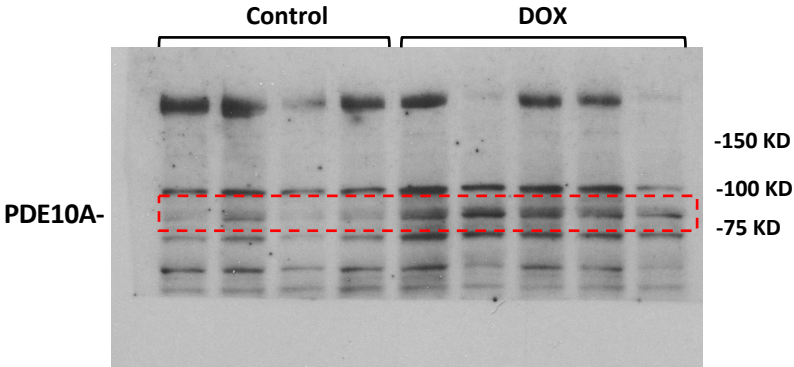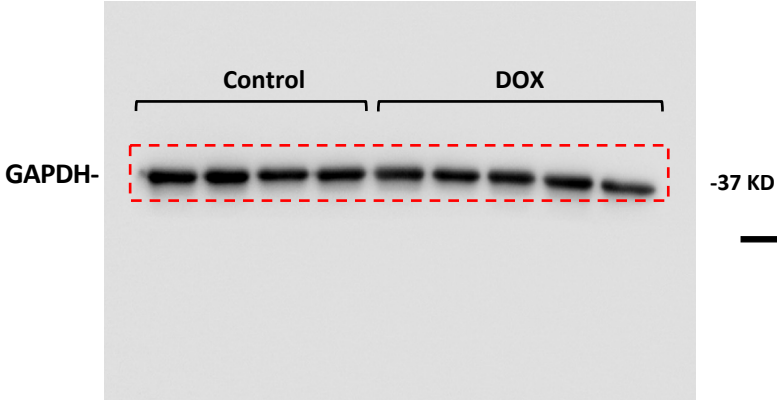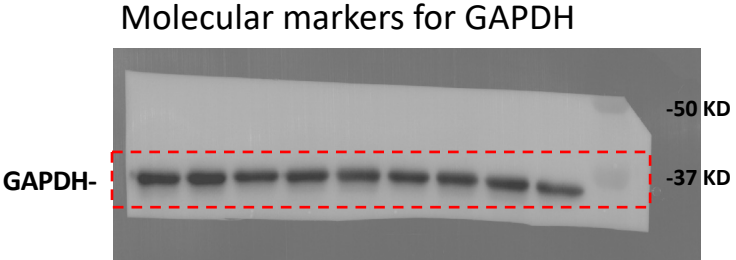

# Full unedited gel for Figure 4B

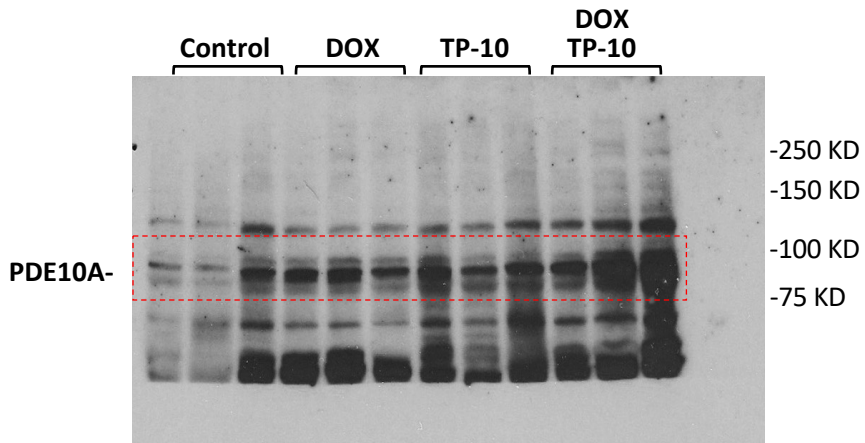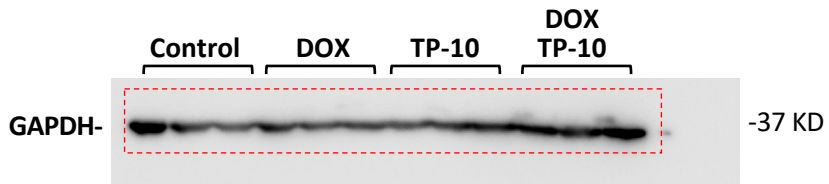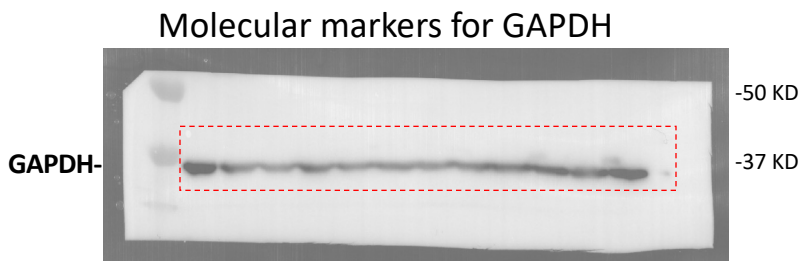

Supplement: NIHMS1899229-supplement-Uncut_gel_blots.pdf [file NIHMS1899229-supplement-Uncut_gel_blots.pdf]
